# Supplementary material for: Study on a polymerizable visible light initiator for fabrication of biosafety materials
Source: Royal Society of Chemistry journal article supplement (doi:10.1039/c9py00173e), 2019-01-01
Supplement: c9py00173e1.pdf [file c9py00173e1.pdf]

## SUPPORTING INFORMATION FOR:

### Study on a polymerizable visible light initiator for fabrication of biosafety materials

Xing Huang<sup>a,b</sup>, Yuxi Zhang<sup>a,\*</sup>, Mengquan Shi<sup>a</sup>, Yunlong Zhang<sup>a</sup>, Yuxia Zhao<sup>a,\*</sup>

<sup>a</sup> Key Laboratory of Photochemical Conversion and Optoelectronic Materials,  
Technical Institute of Physics and Chemistry, Chinese Academy of Sciences.,

29 Zhongguancun East Road, Haidian District, Beijing, 100190, China;

<sup>b</sup>University of Chinese Academy of Sciences, No.19A Yuquan Road, Beijing, 100049,  
China;

\*[yuxia.zhao@mail.ipc.ac.cn](mailto:yuxia.zhao@mail.ipc.ac.cn); [zhangyx@mail.ipc.ac.cn](mailto:zhangyx@mail.ipc.ac.cn); phone +86 010-82543569

## CONTENTS

**Scheme S1** Chemical structures of monomer PEGDA400 and ETPTA.

**Fig. S1** <sup>1</sup>H-NMR and <sup>13</sup>C-NMR spectra of **PBDA** in DMSO-d<sub>6</sub>.

**Fig. S2** Normalized linear absorption spectra and fluorescence emission spectra of **BDEA** (A) and **PBDA** (B) in different solvents and resin (**R4** and **R6**) with concentration of 1.0×10<sup>-6</sup> M.

**Fig. S3** UV-Vis spectra changes of PIs in DMSO under irradiation of a 473 nm diode laser in N<sub>2</sub> atmosphere.

**Fig. S4** (A) Transient absorption spectrum of PBDA in DMSO (1.0×10<sup>-4</sup> M) using the 480 nm laser excitation with a maximum output energy of 10 mJ/pulse. (B) Exponential Fitting curve of time profiles of the absorbance at 700 nm.

**Fig. S5** DMSO extracts of crushed samples of photocured **R4**, **R6**, **R7** and **R8**.

**Fig. S6** Logo of TIPC fabricated by changing the incident laser energy with a fixed line

scan speed of 110  $\mu\text{m/s}$ .

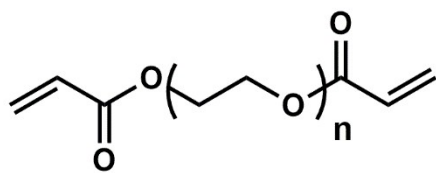

**PEGDA400**

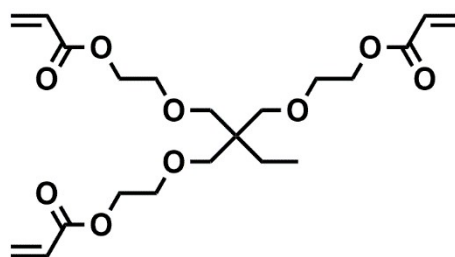

**ETPTA**

**Scheme S1** Chemical structures of monomer PEGDA400 and ETPTA.

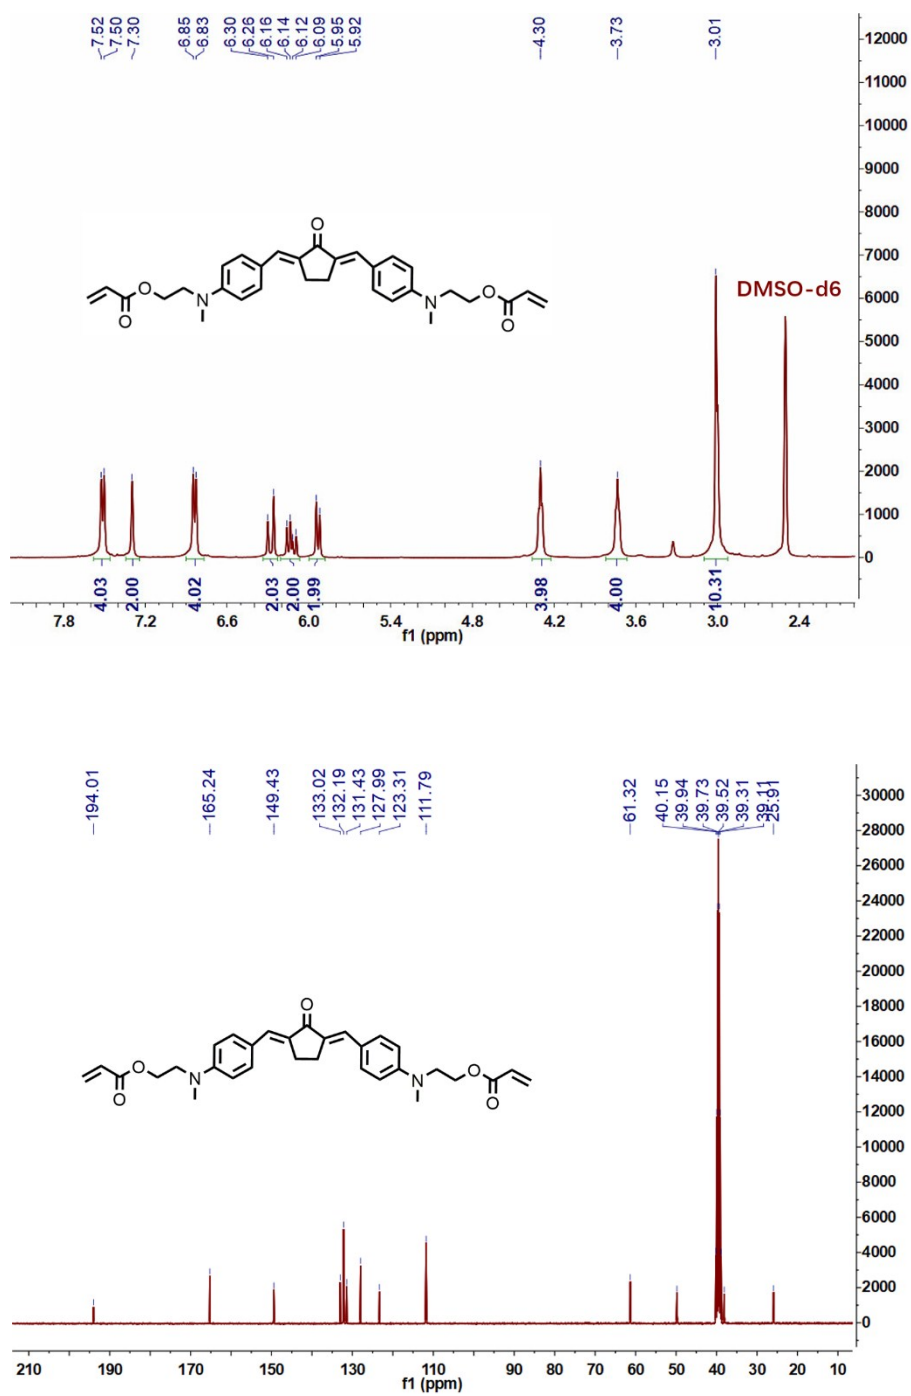

**Fig. S1** <sup>1</sup>H-NMR and <sup>13</sup>C-NMR spectra of PBDA in DMSO-d<sub>6</sub>.

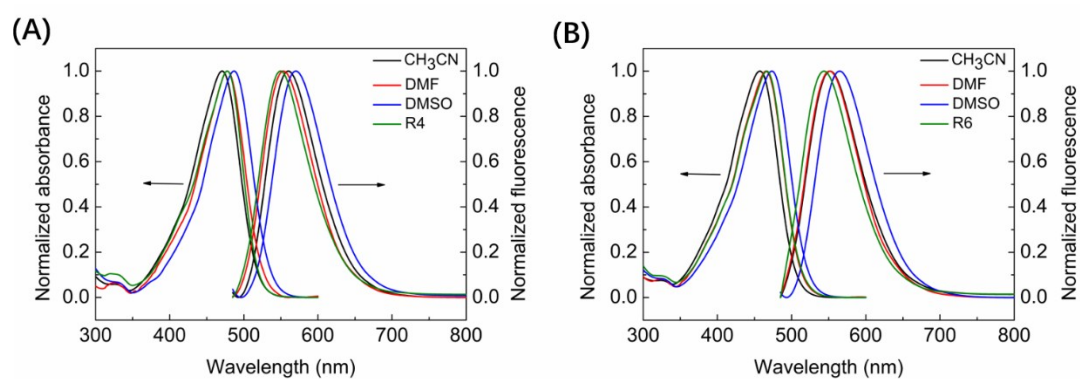

**Fig. S2** Normalized linear absorption spectra and fluorescence emission spectra of **BDEA** (A) and **PBDA** (B) in different solvents and resin (**R4** and **R6**) with concentration of  $1.0 \times 10^{-6}$  M.

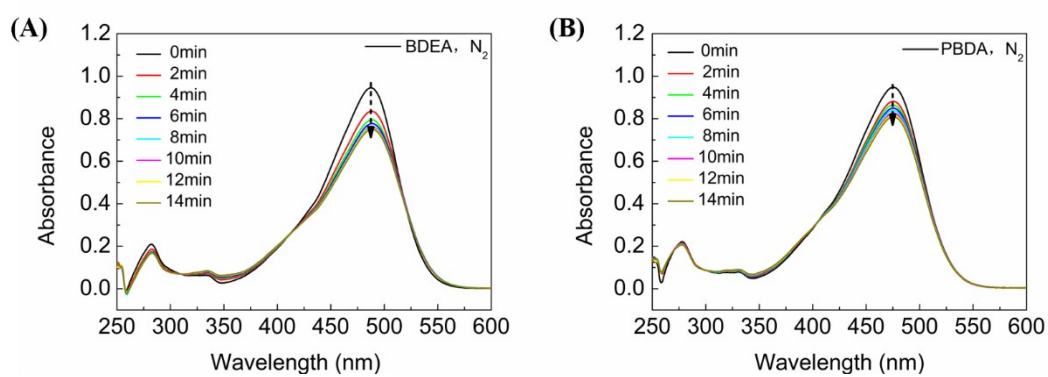

**Fig. S3** UV-Vis spectra changes of PIs in DMSO under irradiation of a 473 nm diode laser in N<sub>2</sub> atmosphere.

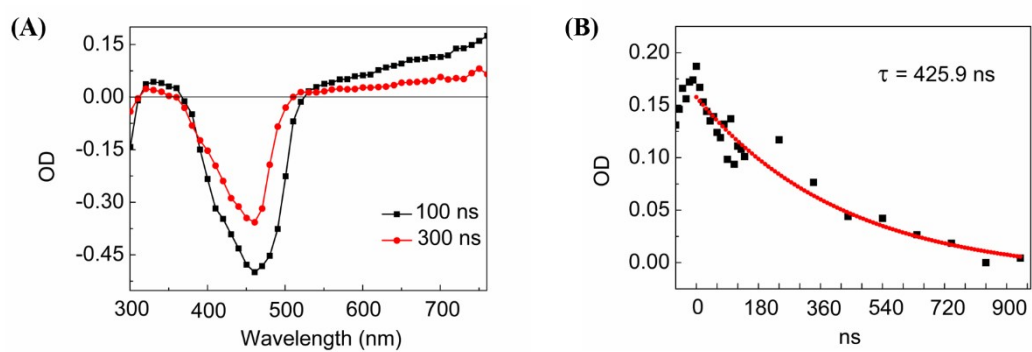

**Fig. S4** (A) Transient absorption spectrum of PBDA in DMSO ( $1.0 \times 10^{-4}$  M) using the 480 nm laser excitation with a maximum output energy of 10 mJ/pulse. (B) Exponential Fitting curve of time profiles of the absorbance at 700 nm.

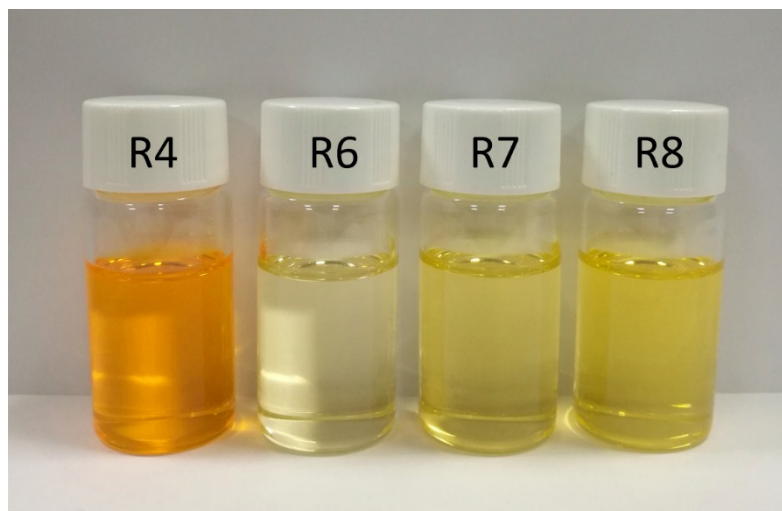

**Fig. S5** DMSO extracts of crushed samples of photocured **R4**, **R6**, **R7** and **R8**.



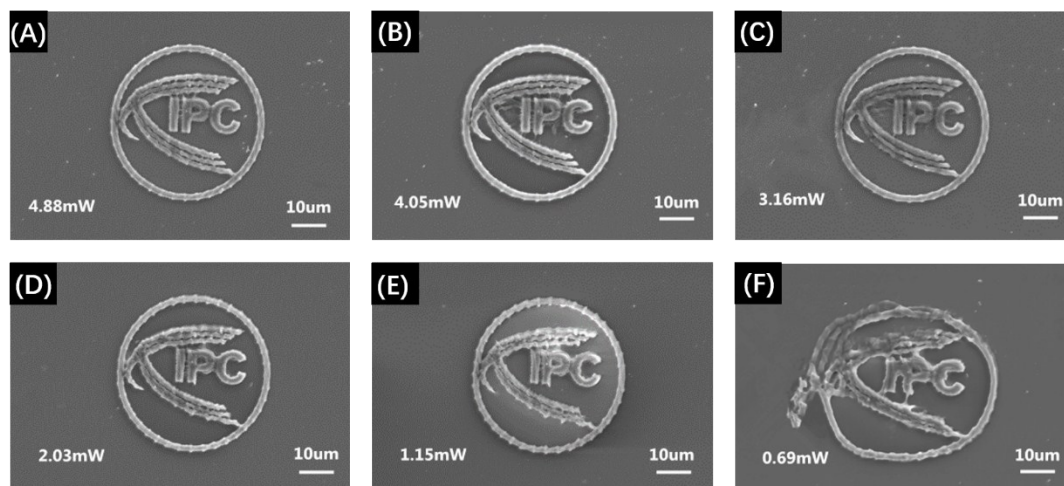

**Fig. S6** Logo of TIPC fabricated by changing the incident laser energy with a fixed line scan speed of 110  $\mu\text{m/s}$ .
